# Supplementary material for: Highly Selective Synthesis of Chlorophenols under Microwave Irradiation
Source: Hindawi journal article supplement (doi:10.1155/2016/2960414), 2016-01-01
Supplement: f1 [file 2960414.f1.doc]

**Supplementary Materials for**

**Highly selective synthesis of chlorophenols under microwave irradiation**

Yawen Xiong1, Hongdong Duan1,*, Xia Meng1, Zhaoyun Ding1, Weichun Feng2

1School of Chemistry and Pharmaceutical Engineering, Qilu University of Technology, Jinan 250353, PR China

2Chemical Technology Academy of Shandong Province, Jinan 250014, PR China

Correspondence: E-mail address: hdduan67@163.com

Figure S1. 1H NMR spectrum of **1b**

Figure S2. HRMS spectrum (negative) of **1b**

Figure S3. 1H NMR spectrum of **2b**

Figure S4. HRMS spectrum (negative) of **2b**

Figure S5. 1H NMR spectrum of **3b**

Figure S6. HRMS spectrum (negative) of **3b**

Figure S7. 1H NMR spectrum of **4b**

Figure S8. HRMS spectrum (negative) of **4b**

Figure S9. 1H NMR spectrum of **5b**

Figure S10. HRMS spectrum (negative) of **5b**

Figure S11. 1H NMR spectrum of **6b**

Figure S12. HRMS spectrum (negative) of **6b**

Figure S13. 1H NMR spectrum of **7b**

Figure S14. HRMS spectrum (negative) of **7b**
